# Supplementary material for: Keratinocyte-derived IκBζ drives psoriasis and associated systemic inflammation
Source: JCI Insight. 2019 Nov 14;4(22):e130835. doi: 10.1172/jci.insight.130835 (PMC6948851; doi:10.1172/jci.insight.130835)
Supplement: Supplemental data [file jciinsight-4-130835-s174.pdf]

## **Supplementary information**

# **Keratinocyte-derived I $\kappa$ B $\zeta$ drives psoriasis and associated systemic inflammation**

**Sebastian Lorscheid<sup>1</sup>, Anne Müller<sup>1</sup>, Jessica Löffler<sup>1</sup>, Claudia Resch<sup>1</sup>, Philip Bucher<sup>1</sup>,  
Florian C. Kurschus<sup>2,3</sup>, Ari Waisman<sup>3</sup>, Knut Schäkel<sup>2</sup>, Stephan Hailfinger<sup>1,4</sup>,  
Klaus Schulze-Osthoff<sup>1,4,5</sup>, Daniela Kramer<sup>1,6</sup>**

<sup>1</sup> Interfaculty Institute for Biochemistry, University of Tübingen, Hoppe-Seyler-Strasse 4,  
72076 Tübingen, Germany

<sup>2</sup> Department of Dermatology, Heidelberg University Hospital, 69120 Heidelberg, Germany

<sup>3</sup> Institute for Molecular Medicine, University Medical Center of the Johannes Gutenberg-  
University Mainz, Mainz, Germany

<sup>4</sup> Cluster of Excellence iFIT (EXC 2180) "Image-Guided and Functionally Instructed Tumor  
Therapies", University of Tübingen, Germany

<sup>5</sup> German Cancer Consortium (DKTK) and German Cancer Research Center (DKFZ), 69120  
Heidelberg, Germany

<sup>6</sup> To whom correspondence should be addressed: [daniela.kramer@uni-tuebingen.de](mailto:daniela.kramer@uni-tuebingen.de)

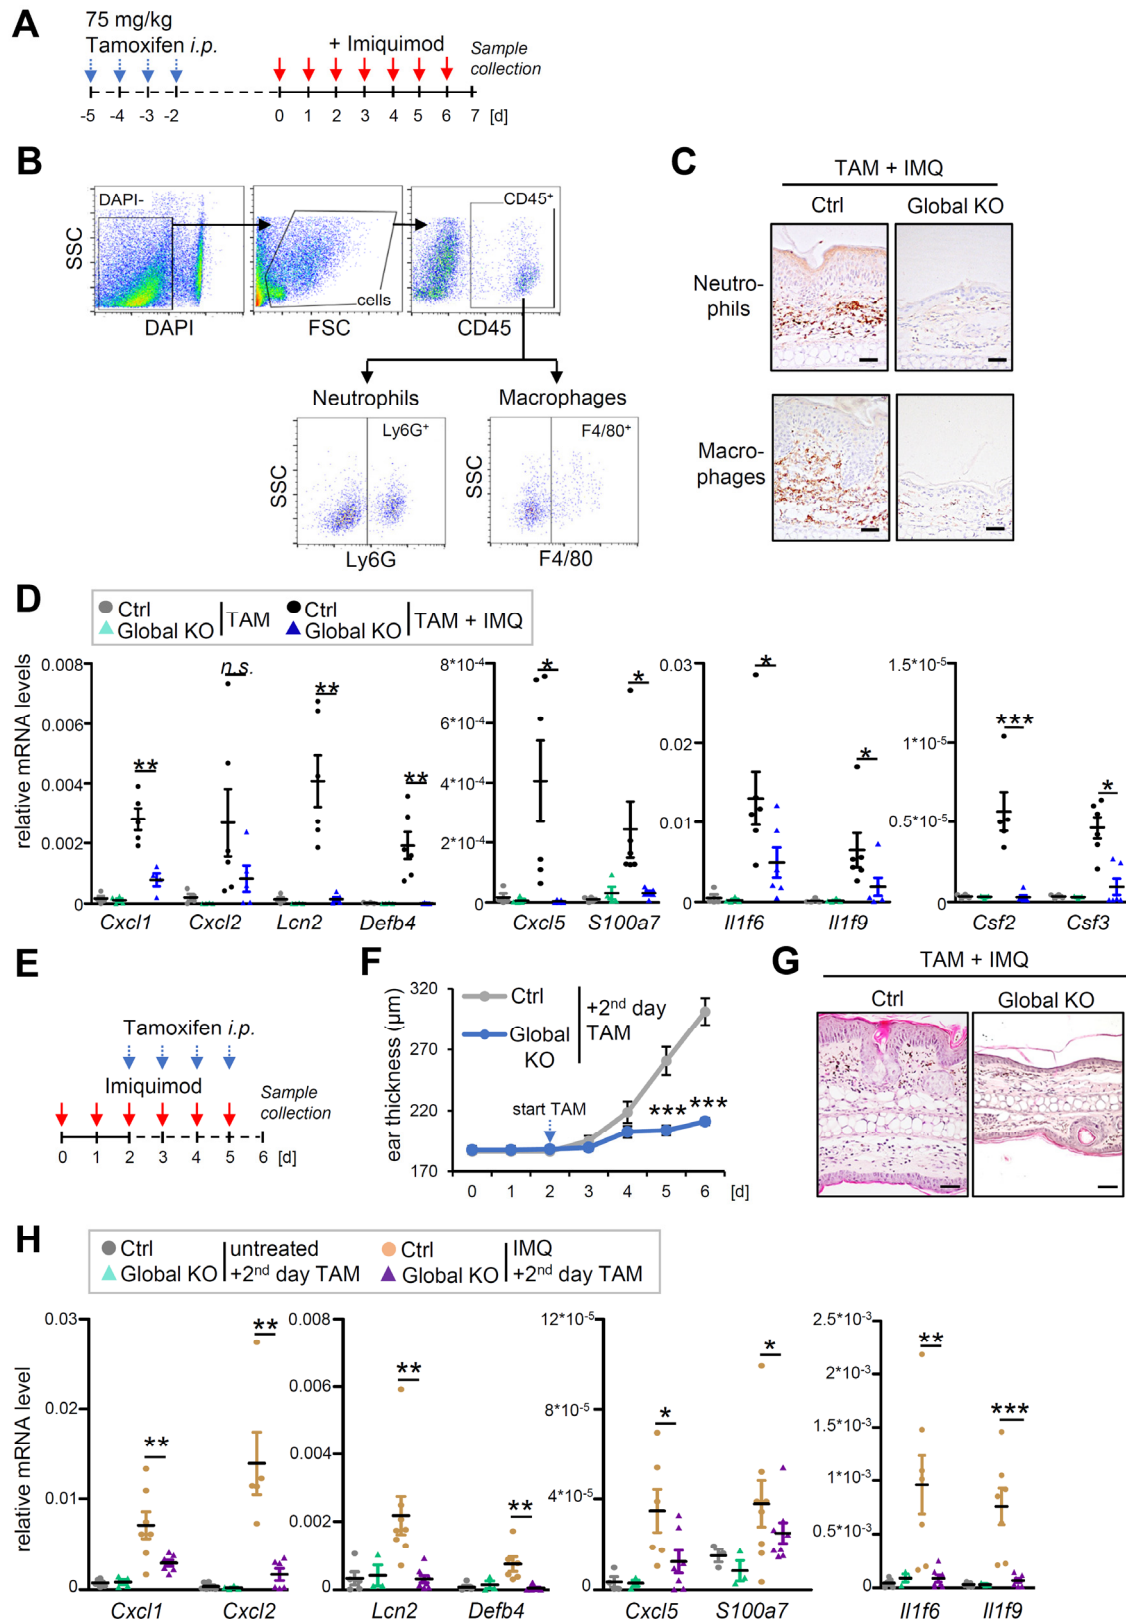

**Supplemental Figure 1. Extended phenotype analysis of imiquimod-treated K14-cre *Nfkbiz* KO mice. (A)** Treatment scheme for the induction of global *Nfkbiz* deletion using tamoxifen (TAM) injections (*i.p.*) prior to IMQ treatment. **(B)** Gating strategy for the

quantification of neutrophil and macrophage numbers in IMQ-treated ears. **(C)** IHC staining of neutrophils (MPO staining) and macrophages (F4/80 staining) in the ears of IMQ-treated global *Nfkbiz* KO mice. Bars: 40  $\mu$ m. **(D)** Gene expression analysis of skin samples from 7 d IMQ-treated, tamoxifen (TAM)-inducible global *Nfkbiz* KO mice. Relative mRNA levels were normalized to *Actin*. n = 4 for untreated mice, n = 6 for IMQ-treated mice  $\pm$  SEM. **(E)** Scheme of IMQ and tamoxifen treatment in order to analyze effects of a delayed global *Nfkbiz* deletion in mice on psoriasis-related gene expression and disease progression. **(F)** Measurement of the ear thickness from mice treated as in (E). **(G)** H&E staining from ears of IMQ-treated control and global (*Nfkbiz*) KO mice at day 7. Mice received tamoxifen treatment 2 days delayed, as depicted in (E). Bars: 40  $\mu$ m. **(H)** Gene expression analysis from skin samples of mice that were treated as in (E), similar analysis as in (D). n = 3-8 samples per group  $\pm$  SEM. P-values were calculated using the Student's t-test. (\*p < 0.05, \*\*p < 0.01, \*\*\*p < 0.001).

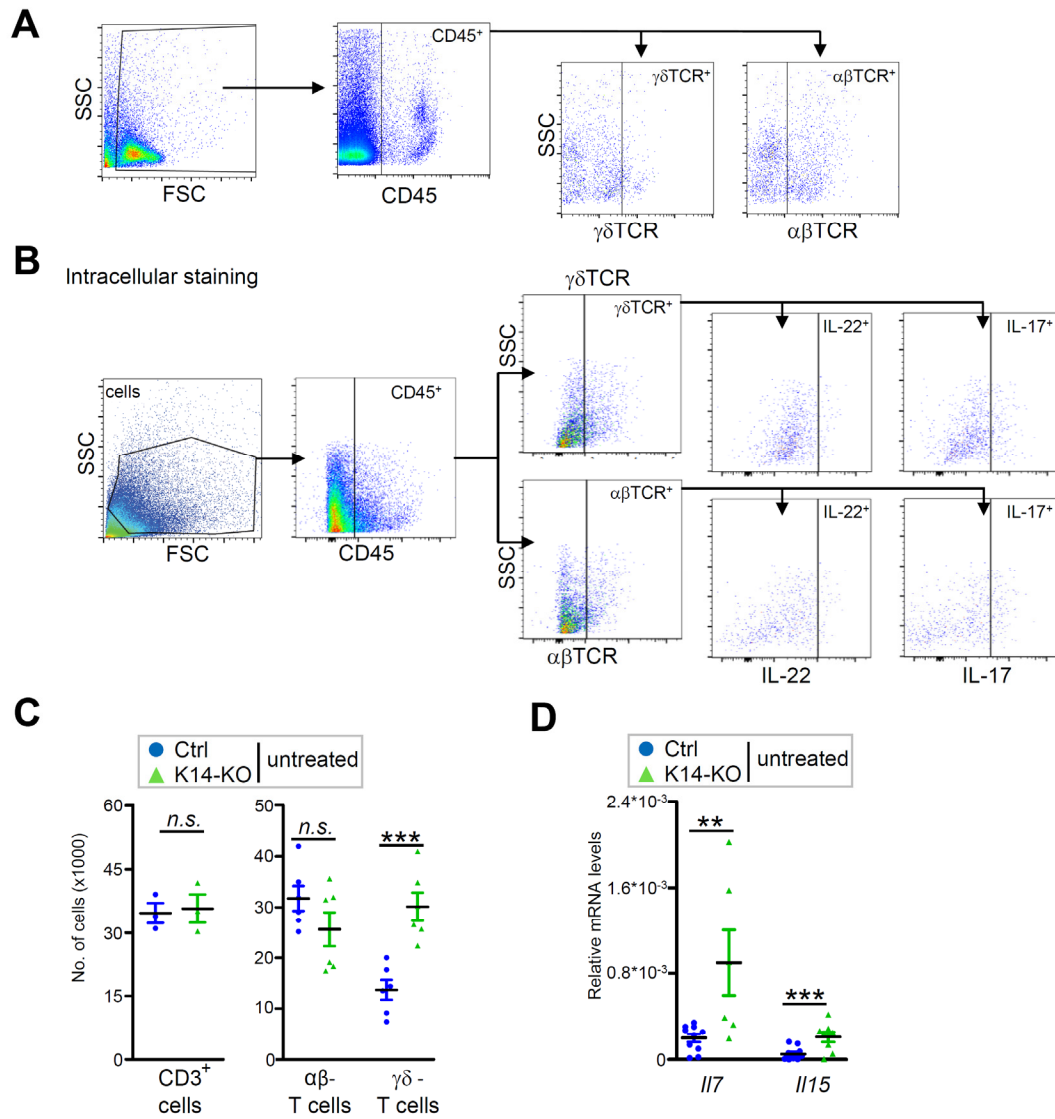

**Supplemental Figure 2. Extended analysis of skin-infiltrating T cells in untreated and IMQ-treated K14-cre *Nfkbiz* KO mice.** (A) Gating strategy for  $\alpha\beta$  and  $\gamma\delta$  T cells from ears of untreated and IMQ-treated mice. (B) Gating strategy for intracellular staining of IL-22 and IL-17A in  $\alpha\beta$  and  $\gamma\delta$  T cells from IMQ-treated Ctrl and K14-KO mice. Note that gate settings were slightly different as in (A) due to the fixation and permeabilization of the cells. (C) Flow cytometry analysis of T-cell subsets in the ears of untreated Ctrl and K14-KO mice. T-cell subsets were detected as CD45<sup>+</sup> and either CD3<sup>+</sup>,  $\alpha\beta$ TCR<sup>+</sup> or  $\gamma\delta$ TCR<sup>+</sup> cells. Shown are the mean values of 3-6 ears per group  $\pm$  SEM. (D) Gene expression analysis of *Il7* and *Il15* in untreated Ctrl and K14-KO mice. Relative mRNA levels were normalized to *Actin*. n = 6  $\pm$  SEM. P-values were calculated using the Student's t-test. (\*p < 0.05, \*\*p < 0.01, \*\*\*p < 0.001).

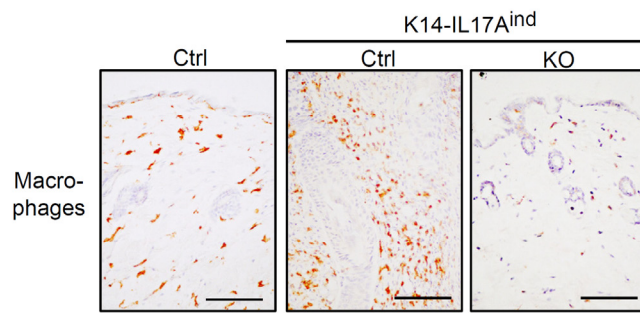

**Supplemental Figure 3. Macrophage infiltration into the skin of K14-IL17A<sup>ind</sup> IκBζ KO mice.** Detection of macrophages by F4/80 staining in skin sections of 15-week-old K14-IL17A<sup>ind</sup> mice with heterozygous or homozygous deletion of IκBζ.

**Table S1. List of gene expression primer.**

| <b>Primer</b> | <b>forward</b>               | <b>reverse</b>           |
|---------------|------------------------------|--------------------------|
| <i>Actin</i>  | AGGAGTACGATGAGTCCGGC         | GGTGTAAAACGCAGCTCAGTA    |
| <i>Ccl17</i>  | AATGTAGGCCGAGAGTGCTG         | ACAGTCAGAAACACGATGGC     |
| <i>Ccl2</i>   | CTGGAGCATCCACGTGTTGG         | CCCATTCTTCTTGGGGTCAG     |
| <i>Ccr4</i>   | AGCCTGGTTACAAGCGTAGAG        | GAAAGCCAAACTGCACGGAC     |
| <i>Ccr6</i>   | CCTCACATTCTTAGGACTGGAGC      | GGCAATCAGAGCTCTCGGA      |
| <i>Csf2</i>   | TCACGTTGAATGAAGAGGTAGAA<br>G | ACTTGTGTTTCACAGTCCGTTTC  |
| <i>Csf3</i>   | ATCCATGGCTCAACTTTCTGC        | GCTGCAGGGCCATTAGCTTC     |
| <i>Cxcl1</i>  | ACGTGTTGACGCTTCCCTTG         | TCCTTTGAACGTCTCTGTCCC    |
| <i>Cxcl2</i>  | CGCCCAGACAGAAAGTCATAGC       | CTTTGGTTCTTCCGTTGAGGG    |
| <i>Cxcl5</i>  | CCCTACGGTGGAAGTCATAGC        | GAACACTGGCCGTTCTTTCC     |
| <i>Defb4</i>  | GGTGCTGCTGTCTCCACTTG         | TATTCATCTTGCTGGTTCTTCGTC |
| <i>Il15</i>   | TGCAGTGCATCTCCTTACGC         | GTGGATTCTTTCCTGACCTCTCTG |
| <i>Il17a</i>  | GCCCTCAGACTACCTCAACC         | TTCCCTCCGCATTGACACAG     |
| <i>Il19</i>   | TGTGGACATGCGCCTCATAG         | GCAGGTTGTTGGTCATGCAG     |
| <i>Il1b</i>   | AGCTGAAAGCTCTCCACCTC         | GCTTGGGATCCACACTCTCC     |
| <i>Il1f6</i>  | GCCTGTTCTGCACAAAGGATG        | ACAGCGATGAACCAACCAGG     |
| <i>Il1f9</i>  | GTCAGCGTGACTATCCTCCC         | TGGCTTCATTGGCTCAGGG      |
| <i>Il20</i>   | TTGGA CTGTTCTCCGCTGTG        | ATCTTCAGCTTGCACACTATCC   |
| <i>Il22</i>   | CCTACATGCAGGAGGTGGTG         | CCCAATCGCCTTGATCTCTCC    |
| <i>Il23a</i>  | CAGCTCTCTCGGAATCTCTGC        | TGTCCTTGAGTCCTTGTGGG     |
| <i>Il7</i>    | ATTATGGGTGGTGAGAGCCG         | AAAGAAACATGGAACATGGTCTGC |
| <i>Lcn2</i>   | AATGTCACCTCCATCCTGGTC        | ACTGGTTGTAGTCCGTGGTG     |
| <i>Nfkbiz</i> | AACTCGCCAAGAGACCAAGTG        | AGAGCCACTGACTTGAACG      |
| <i>S100a7</i> | TCTGCTCTTGGATAGTGTGCC        | TGATGTAGTATGGCTGCCTGC    |
| <i>S100a9</i> | AATGGTGGAAGCACAGTTGG         | CTGGTTTGTGTCCAGGTCCTC    |
